# Supplementary material for: The Akt1/IL-6/STAT3 pathway regulates growth of lung tumor initiating cells
Source: PubMed Central journal article supplement (PMC4767462; doi:10.18632/oncotarget.5626), 2015-10-13
Supplement: oncotarget-06-42667-s001.pdf [file oncotarget-06-42667-s001.pdf]

## SUPPLEMENTARY FIGURES AND TABLES

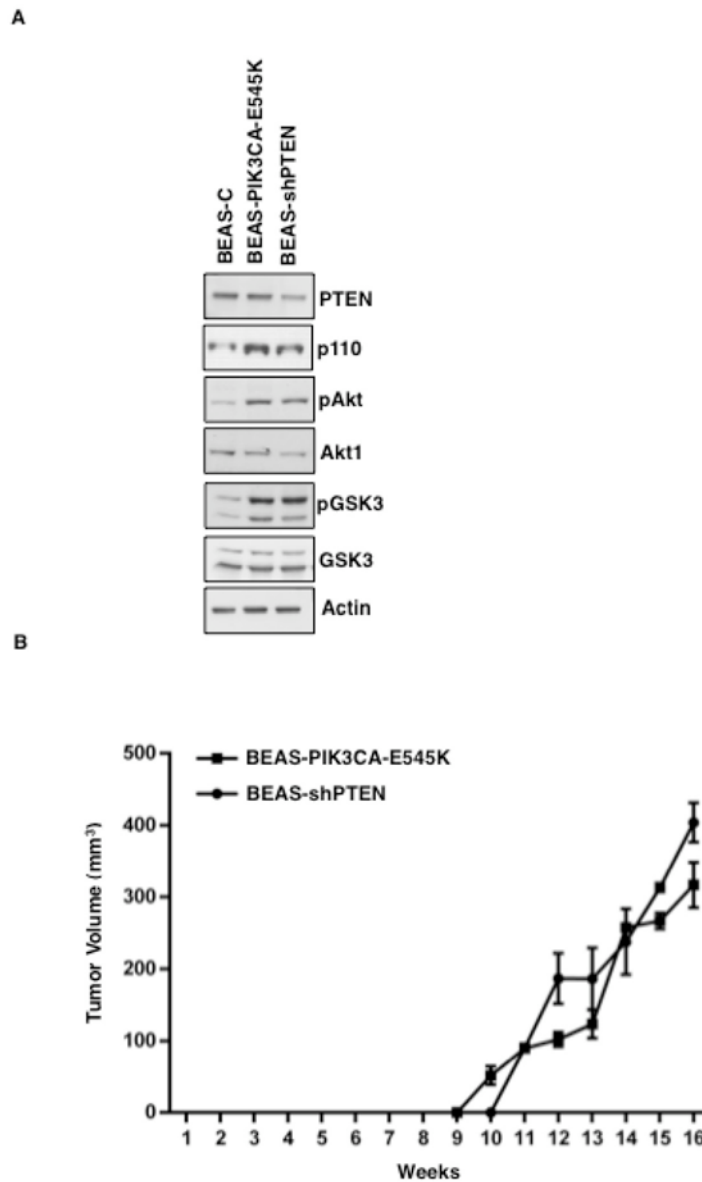

**Supplementary Figure S1: Activation of PTEN/PI3K/Akt1 pathway promotes tumorigenesis in BEAS-2B cells.** **A.** Immunoblot analysis of PTEN, p110, phosphorylated and total Akt1, phosphorylated and total GSK3 and actin in BEAS-C, BEAS-PIK3CA and BEAS-shPTEN cells. **B.** Tumor growth promoted by BEAS-PIK3CA and BEAS-shPTEN cells ( $5 \times 10^6$ ) grown in adherent condition injected in NOD/SCID mice ( $n = 8/\text{group}$ ).

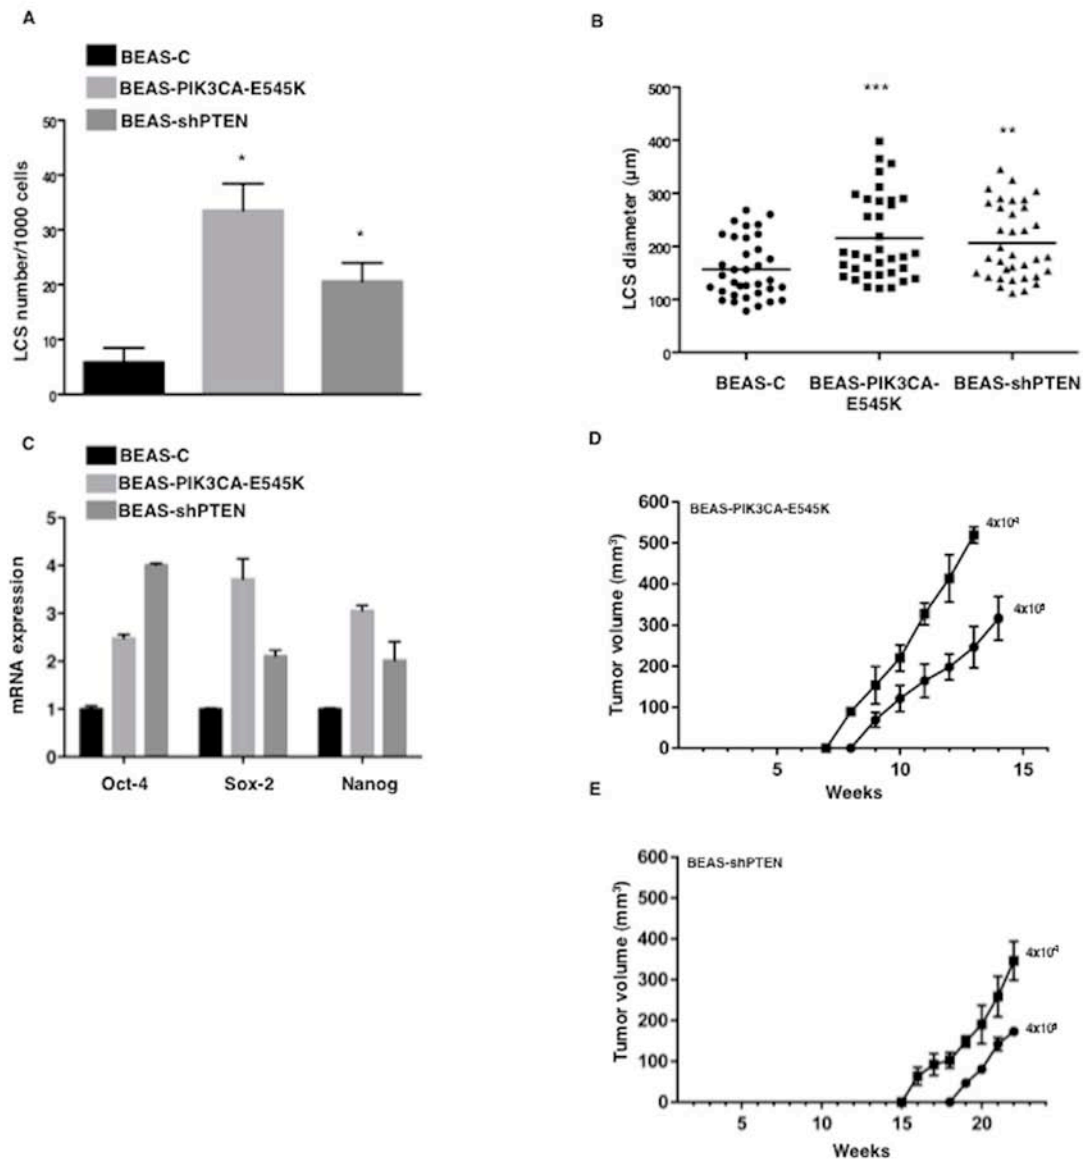

**Supplementary Figure S2: Activation of PTEN/PIK3CA/Akt1 pathway regulates formation and maintenance of LCSs.** **A.** Number of LCSs generated from BEAS-C, BEAS-PIK3CA and BEAS-shPTEN cells. \* $p < 0.05$ . **B.** Phase-contrast microscopy analysis of size distribution ( $\mu\text{m}$ ) of LCSs generated from BEAS-C, BEAS-PIK3CA and BEAS-shPTEN cells \*\*\* $p < 0.001$ , \*\* $p < 0.01$ . **C.** Relative mRNA expression of stemness genes by Q-RTPCR in BEAS-C cells and derivatives (mean  $\pm$  SD). **D.** Tumor growth promoted by single cell suspensions of LCSs generated from BEAS-PIK3CA ( $4 \times 10^3$ ,  $4 \times 10^4$  cells) injected into the flank of NOD/SCID mice ( $n = 8$ /group). **E.** Tumor growth promoted by single cell suspensions of LCSs generated from BEAS-shPTEN ( $4 \times 10^3$ ,  $4 \times 10^4$  cells) injected into the flank of NOD/SCID mice ( $n = 8$ /group).

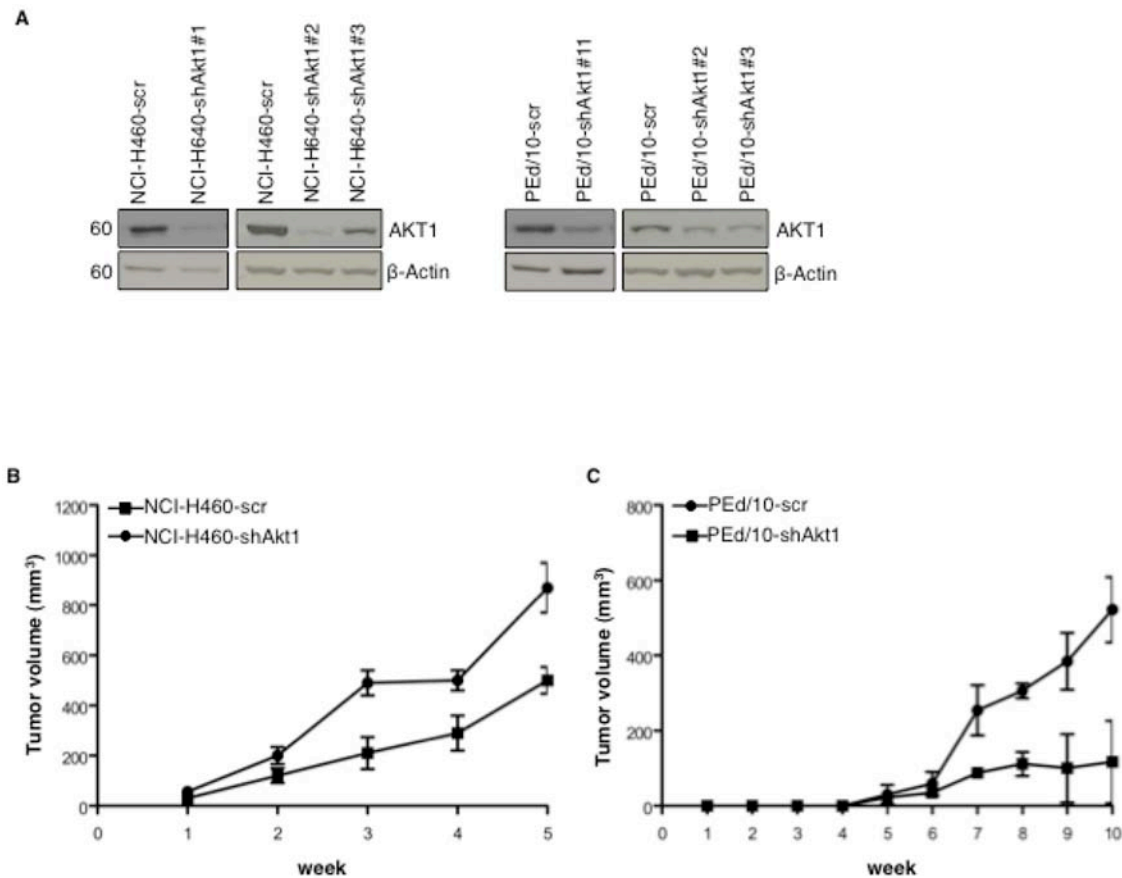

**Supplementary Figure S3: Akt1 suppression reduces *in vivo* growth of established and primary NSCLC cells.** A. Left, immunoblot of Akt1 in NCI-H460-scr cells and the corresponding NCI-H460-shAkt1 cells (clones #1, #2, #3); right, immunoblot of Akt1 in PEd/10-scr and PEd/10-shAkt1 cells (clones #1, #2, #3). B. Tumor growth promoted by NCI-H460-scr and NCI-H460-shAkt1 cells grown in adherent conditions injected into nude mice ( $n = 5/\text{group}$ ). C. Tumor growth promoted by PEd/10-scr and PEd/10-shAkt1 cells grown in adherent conditions injected into nude mice, ( $n = 5/\text{group}$ ).

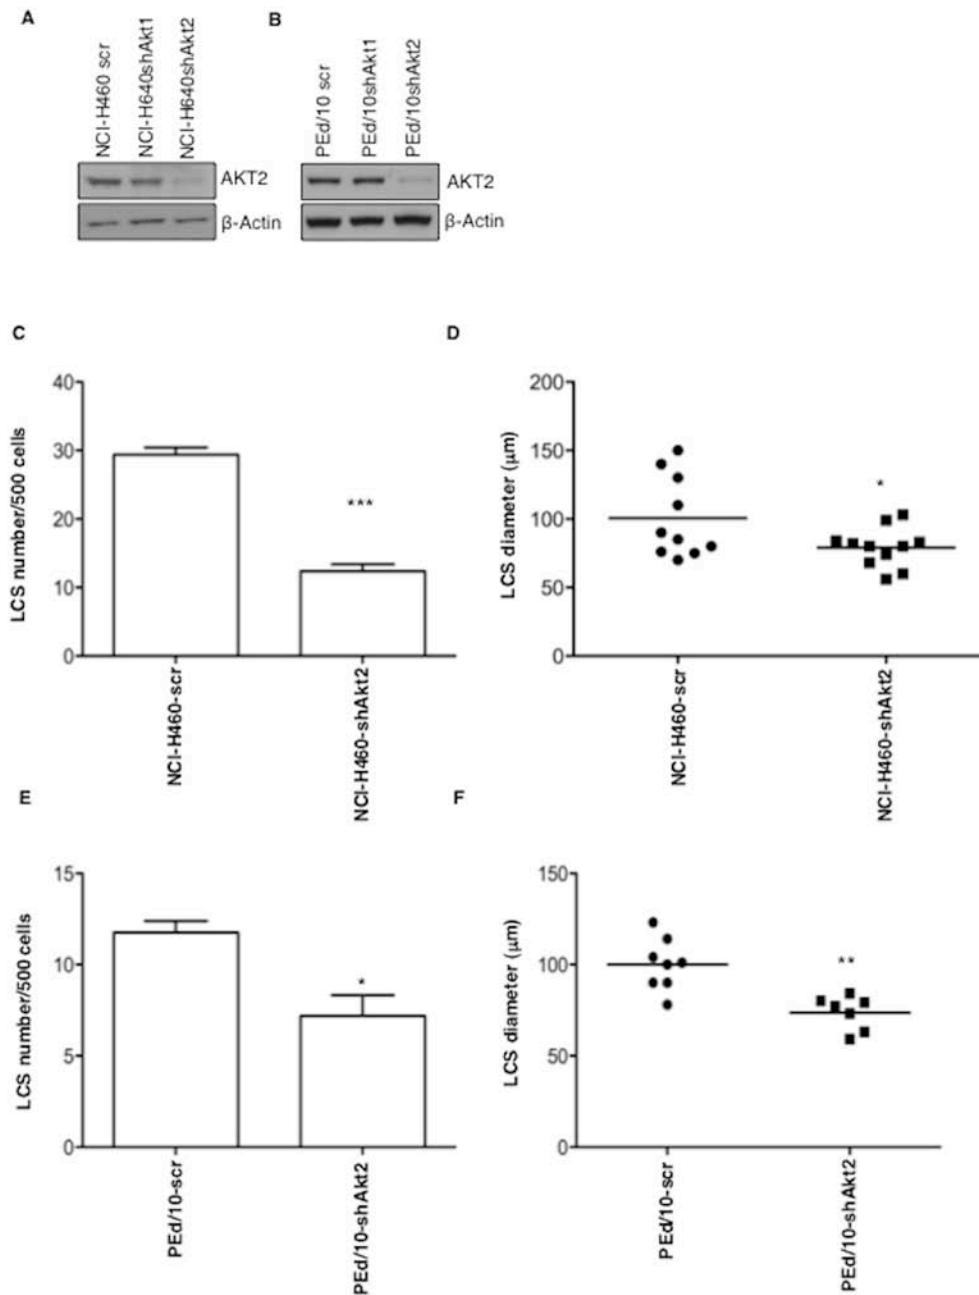

### Supplementary Figure S4: Relative effects of Akt1 and Akt2 on the formation and maintenance of NSCLC LCSs.

**A.** Immunoblot of Akt2 in NCI-H460-scr and the corresponding shAkt1- and shAkt2-interfered cells. **B.** Immunoblot of Akt2 in PEd/10-scr cells and the corresponding shAkt1- and shAkt2-interfered cells. **C.** Number of primary LCSs generated from NCI-H460-scr or from the corresponding cells interfered for Akt2.  $**p < 0.01$ . **D.** Phase-contrast microscopy analysis of size distribution ( $\mu\text{m}$ ) of LCSs generated from NCI-H460-scr cells or from the corresponding cells interfered for Akt2.  $*p < 0.05$ . **E.** Number of primary LCSs generated from PEd/10-scr cells or from the corresponding cells interfered for Akt2.  $**p < 0.01$ . **F.** Phase-contrast microscopy analysis of size distribution ( $\mu\text{m}$ ) of LCSs generated from PEd/10-scr cells or from the corresponding cells interfered for Akt2.  $**p < 0.01$ . Data are presented from replicate analysis as the mean  $\pm$  SD.

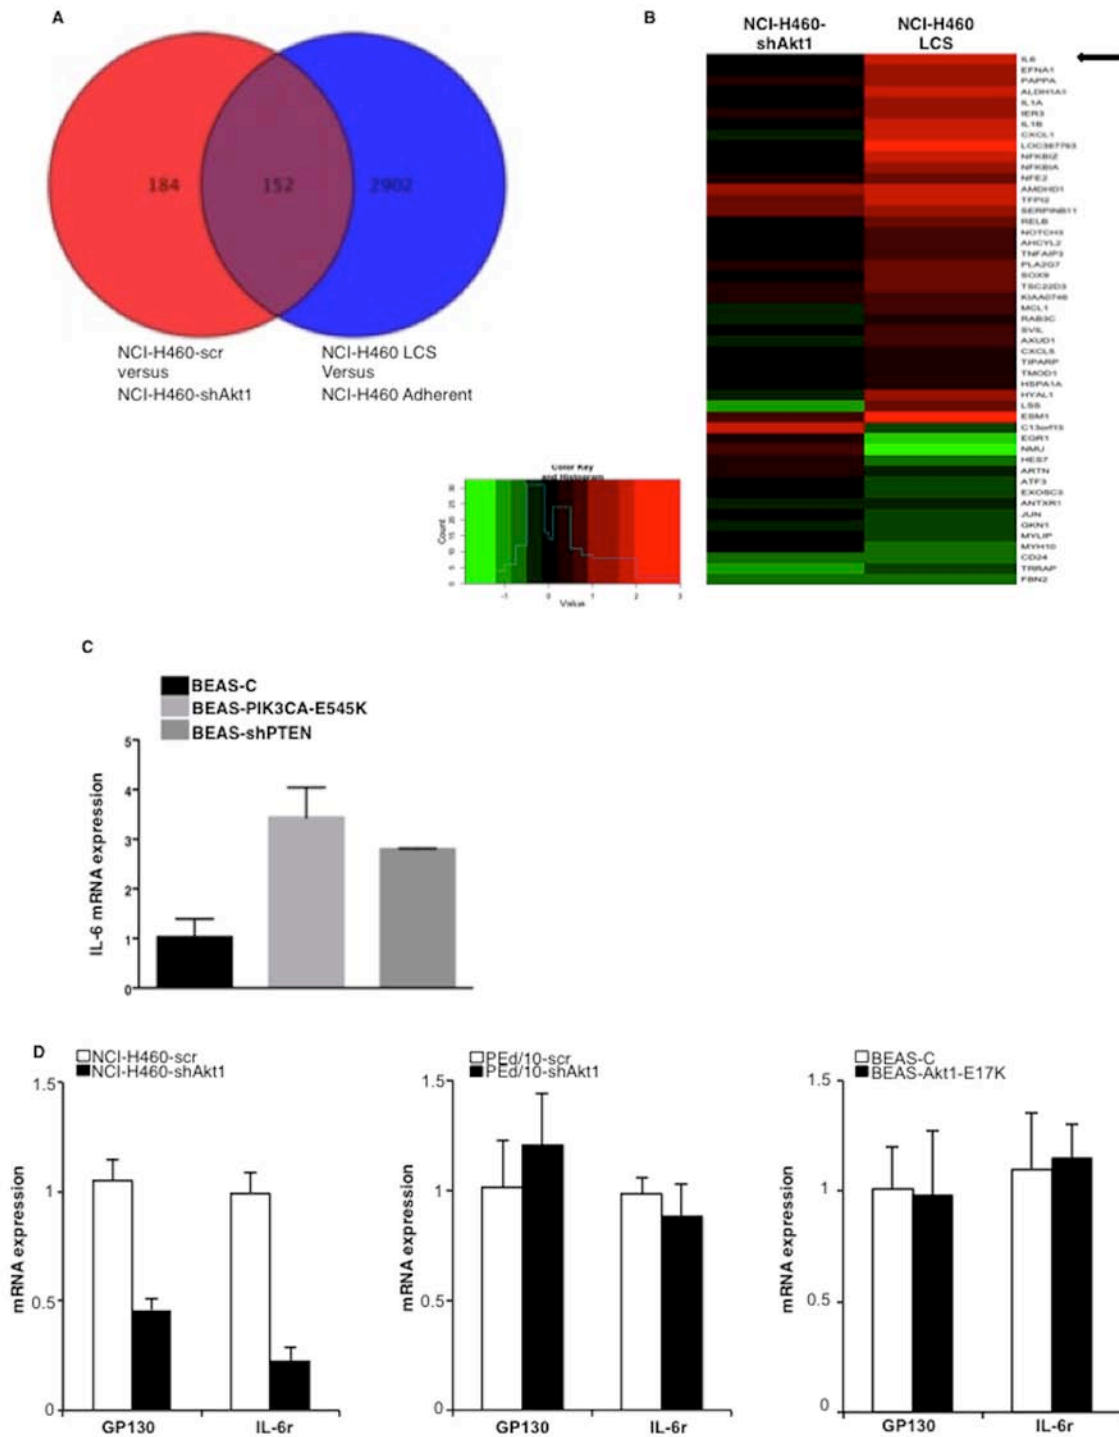

**Supplementary Figure S5: Identification of Akt1-regulated genes that are differentially expressed in NSCLC LCSs.** **A.** Venn diagram showing the comparison between genes that are differentially expressed in Akt1-interfered NCI-H460 cells and genes that are differentially expressed in LCSs from NCI-H460 cells. **B.** Heat-map representation of the comparison between genes that are differentially expressed in Akt1-interfered NCI-H460 cells and in LCSs generated from NCI-H460 cells. **C.** Q-RT-PCR analysis of mRNA expression of IL-6 in BEAS-C and derivative cells. **D.** Q-RT-PCR analysis of mRNA expression of GP130 and IL-6r in NCI-H460 (left), PEEd/10 (middle), BEAS-C (right) and derivative cells.

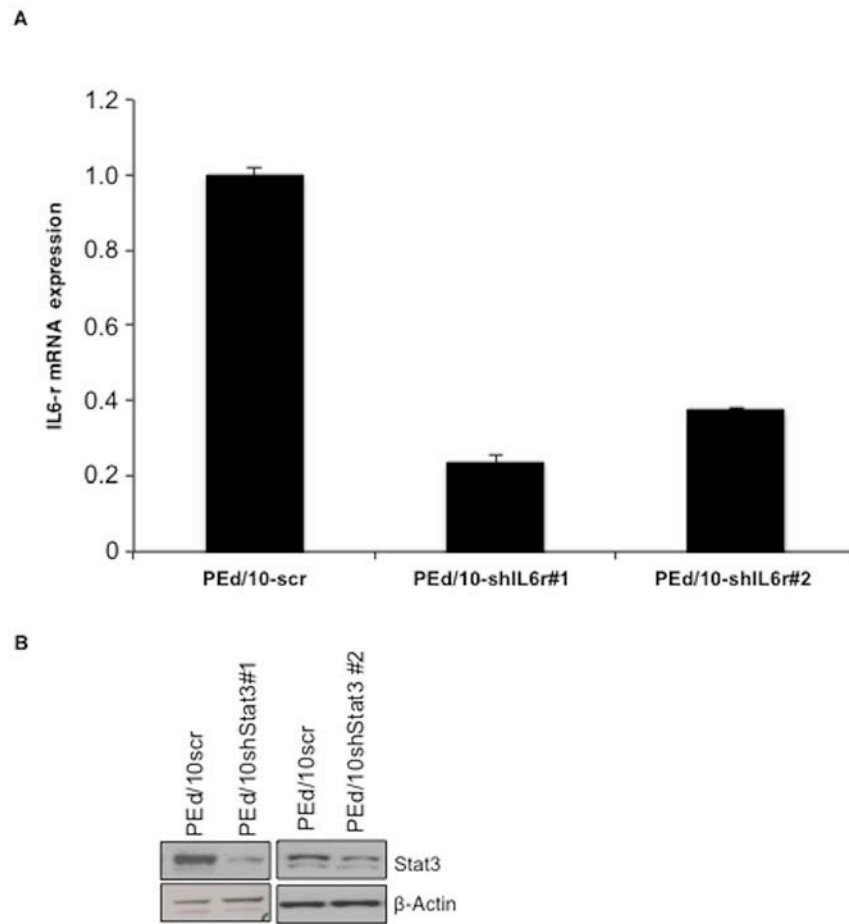

**Supplementary Figure S6: Generation of primary NSCLC cells interfered for IL-6r and STAT3.** **A.** Q-RT-PCR analysis of IL-6r expression in PEd/10 cells and in two different PEd/10-shIL-6r cells (clones #1, #2). **B.** Immunoblot analysis of STAT3 in PEd/10-scr and PEd/10-shSTAT3 cells (clones #1, #2).

**Supplementary Table S1:**

See Supplementary File S1

**Supplementary Table S2:**

See Supplementary File S2

**Supplementary Table S3:**

See Supplementary File S3

**Supplementary Table S4: Analysis of phosphorylated Akt, phosphorylated STAT3 and IL-6 expression in NSCLC**

|                              | pAkt negative <sup>a</sup> | pAkt positive <sup>a</sup> | Total |
|------------------------------|----------------------------|----------------------------|-------|
| IL-6 negative <sup>b</sup>   | 43                         | 16                         | 59    |
| IL-6 positive <sup>b</sup>   | 19                         | 16                         | 35    |
| <b>Total</b>                 | <b>62</b>                  | <b>32</b>                  |       |
| pSTAT3 negative <sup>c</sup> | 43                         | 18                         | 61    |
| pSTAT3 positive <sup>c</sup> | 19                         | 14                         | 33    |
| <b>Total</b>                 | <b>62</b>                  | <b>32</b>                  |       |

<sup>a</sup>Akt activation was evaluated with phospho-specific antibodies (pS473) and scored as negative (<10% of the tumour cells with weak, focal immunopositivity or absence of staining) and positive (>10% of tumour cells with strong or diffuse immunopositivity).

<sup>b</sup>IL-6 was evaluated with specific antibodies and scored as negative (<10% of the tumour cells with weak, focal immunopositivity or absence of staining) and positive (>10% of tumour cells with strong or diffuse immunopositivity).

<sup>c</sup>STAT3 activation was evaluated with phospho-specific antibodies (Y705) and scored as negative (<5% of the tumour cells with weak, focal immunopositivity or absence of staining) and positive (>5% of tumour cells with strong or diffuse immunopositivity).  $n = 94$ ,  $p = 0.044$
